# Supplementary material for: Synthesis, structure and luminescence properties of two Cd(ii)/M(i) (M = K, Rb) interpenetrated heterometallic frameworks based on giant double-walled cages
Source: Royal Society of Chemistry journal article supplement (doi:10.1039/c7ce00803a), 2017-01-01
Supplement: c7ce00803a1.pdf [file c7ce00803a1.pdf]

## Supporting Information

Synthesis, structure and luminescent properties of two Cd(II)/M(I) (M =  
K, Rb) interpenetrated heterometallic frameworks based on giant  
double-walled cages

Xiaowu Xu,<sup>a,b</sup> Chongbin Tian<sup>a</sup> and Shaowu Du<sup>\*a</sup>

<sup>a</sup> *State key Laboratory of Structural Chemistry, Fujian Institute of Research on the  
Structure of Matter, Chinese Academy of Sciences, Fuzhou 350002, P. R. China.  
E-mail: [swdu@fjirsm.ac.cn](mailto:swdu@fjirsm.ac.cn)*

<sup>b</sup> *Graduate University of Chinese Academy of Sciences, Beijing 100039, R. R. China.*

## Experimental section

**Materials and Methods** All the reagents and solvents were purchased from commercial sources and used as received, except for H<sub>6</sub>TDPAT, which was synthesized according to the literature.<sup>1</sup> Thermogravimetric experiments were performed using a GA/NETZSCH STA449C instrument heated from 30 to 800 °C (heating rate of 10 °C min<sup>-1</sup>, nitrogen stream). Elemental analyses of C, H, and N were carried out with a Vario EL III elemental analyzer. High-resolution PXRD patterns were collected using PANalytical X'Pert Pro diffractometer (Cu K $\alpha$  radiation:  $\lambda = 1.54056 \text{ \AA}$ ) in the range of  $5^\circ < 2\theta < 55^\circ$ . IR spectra were performed on a PerkinElmer Spectrum One spectrometer using KBr as pellets over the range 4000–400 cm<sup>-1</sup>. Diffuse reflectance spectra were measured on a Perkin-Elmer Lambda 900 UV-vis-NIR spectrophotometer with an integrating sphere attachment and BaSO<sub>4</sub> as a reference at room temperature. The fluorescence spectra were measured on crystal samples at room temperature using an Edinburgh Analytical instrument FLS920. Gas adsorption measurements were performed in an ASAP (Accelerated Surface Area and Porosimetry) 2020 System.

**Synthesis of H<sub>6</sub>TDPAT.** H<sub>6</sub>TDPAT ligand was synthesized according to the literature. 5-Aminoisophthalic acid (15.2g 0.084mol), NaOH (5.36g 0.134mol), and NaHCO<sub>3</sub> (8.74g 0.104mol) were added into 140mL of H<sub>2</sub>O in a round-bottom flask. The mixture was stirred for 30 min at room temperature; then, 70mL of 1,4-dioxane containing cyanuric chloride (3.68g 0.02mol) was dropwise added with constant stirring. The final mixture was refluxed at 100 °C for 24 h. After cooling to room temperature, the solution was adjusted to pH = 2 with concentrated HCl. A white solid (11 g) was collected by filtration, rinsed several times with distilled water, and dried to get H<sub>6</sub>TDPAT (11.55g, yield: 94%).

**Syntheses of compound 1.** A mixture of Cd(NO<sub>3</sub>)<sub>2</sub>·4H<sub>2</sub>O (62 mg, 0.2 mmol), KCl (29.8 mg, 0.4 mmol), H<sub>6</sub>TDPAT (61.8 mg, 0.1 mmol) ) and two drops of

concentrated HCl was added in 20 mL of Teflon-lined stainless steel vessel with a mixed-solvent (5 mL, DMF/MeOH = 1:1). The mixture was heated to 160 °C in 4 hours and maintained for 2 days under autogenous pressure. Then the reaction system was cooled slowly to room temperature during another 3 days. Colourless cube crystals of **1** were obtained. The product was isolated by decanting the mother liquor and washed with DMF and CH<sub>3</sub>OH for several times and dried in air (yield 45% based on H<sub>6</sub>TDPAT). Elemental analysis (%) for C<sub>68</sub>H<sub>79.5</sub>N<sub>16</sub>O<sub>39.75</sub>Cd<sub>3</sub>K<sub>6</sub> (2328.8): C, 35.04; H, 3.41; N, 9.62; found: C, 34.15; H, 2.67; N, 8.95. IR(KBr, cm<sup>-1</sup>): 3412–3290 (s), 1627 (s), 1520 (s), 1371 (s), 1145 (m), 1096 (m), 1000 (w), 962 (w), 899 (w), 803 (w), 780 (m), 734 (m), 617 (m), 427 (w).

**Syntheses of compound 2.** The synthesis of **2** is very similar to that of **1** except that RbCl (48 mg 0.4 mmol) was used instead of KCl. A colourless cube crystal of **2** was obtained (yield 65% based on H<sub>6</sub>TDPAT). Elemental analysis (%) found for C<sub>68</sub>H<sub>79.5</sub>N<sub>16</sub>O<sub>39.75</sub>Cd<sub>3</sub>Rb<sub>6</sub> (2607.0): C, 31.30; H, 3.05; N, 8.59; found: C, 30.50; H, 2.63; N, 7.88. IR (KBr, cm<sup>-1</sup>): 3370–3106 (s), 1627 (s), 1517 (s), 1364 (s), 1145 (m), 999 (w), 957 (w), 899 (w), 802 (w), 779 (m), 724 (m), 616 (m), 427 (w).

**Single-Crystal Structure Determination** Single crystals of compounds suitable for X-ray diffraction were carefully selected and glued to thin glass fibers with epoxy resin. Intensity data were collected at room temperature on a Rigaku Mercury CCD areadetector diffractometer with a graphite monochromator utilizing Mo K $\alpha$  radiation ( $\lambda$  = 0.71073 Å). Empirical absorption corrections were applied to the data using the Crystal Clear program.<sup>2</sup> The crystal structures were solved by direct methods using SHELXL-97<sup>3</sup> and refined by full-matrix least-squares using SHELXL-2014.<sup>4</sup> The K1 atom in **1** resides on a twofold rotation axis, while both Cd1 and K2 atoms are disordered over two sites about a twofold rotation axis with equal occupancy. The SQUEEZE routine of PLATON was applied to remove the contributions of distorted solvent molecules.<sup>5</sup> The SQUEEZE calculations showed a total solvent accessible area volume of 9604 Å<sup>3</sup> in **1**

(9862 Å<sup>3</sup> in **2**) and the residual electron density amounted to 1572 e per unit cell of **1** (1516 e for **2**), corresponding to nearly 2/3 DMF and 1/3 MeOH per asymmetric unit. The final formula [Cd<sub>3</sub>M<sub>6</sub>(TDPTA)<sub>2</sub>(H<sub>2</sub>O)<sub>9</sub>]·0.75(H<sub>2</sub>O)·4DMF·2MeOH (M = K and Rb) which includes six asymmetric units and the solvents removed by SQUEEZE process were calculated from the TGA results combined with elemental analysis data. All non-hydrogen atoms were refined anisotropically. The hydrogen atoms bonded to carbon were generated geometrically.

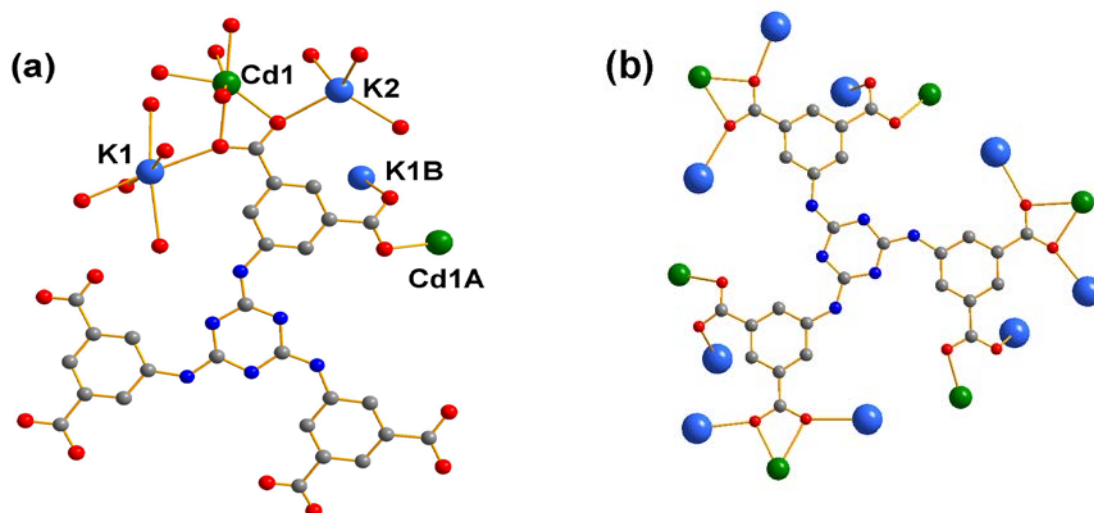

**Fig. S1** (a) Coordination environment of Cd<sup>2+</sup> and K<sup>+</sup> ions in **1**. Hydrogen atoms and lattice solvent molecules are omitted for clarity. Symmetry codes: A, 1 - x, 1-z, 1-y; B, 0.5 + y, -0.5 + z, 0.5 + x. (b) The coordination mode of the H<sub>6</sub>TDPAT ligand.

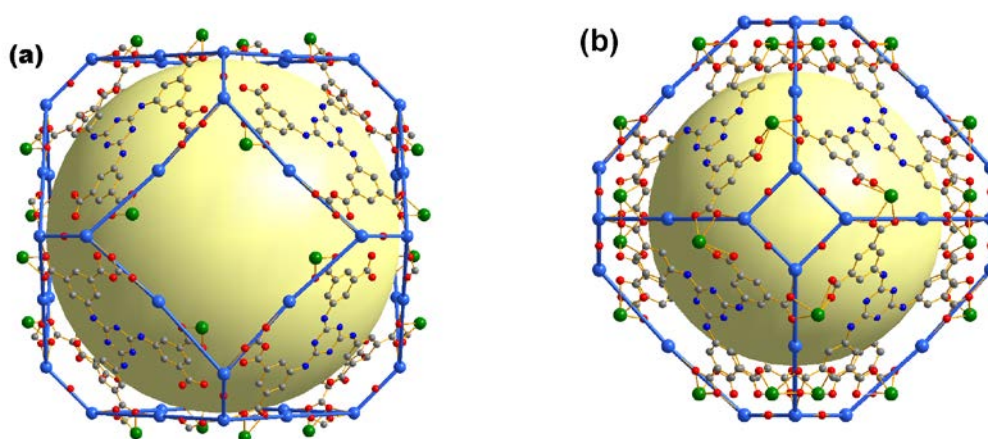

**Fig.S2** (a) The outer cage connected with K<sup>+</sup> ions; (b) The inter cage connected with K<sup>+</sup> ions.

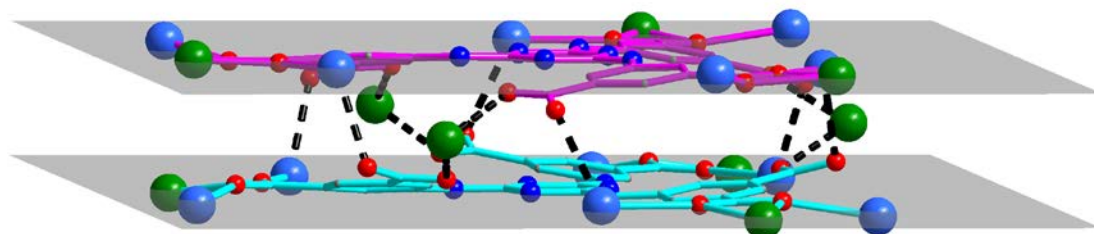

**Fig. S3** The interconnection of outer and inner cages by carboxylate groups of  $\text{TDPAT}^{6-}$  ligands.

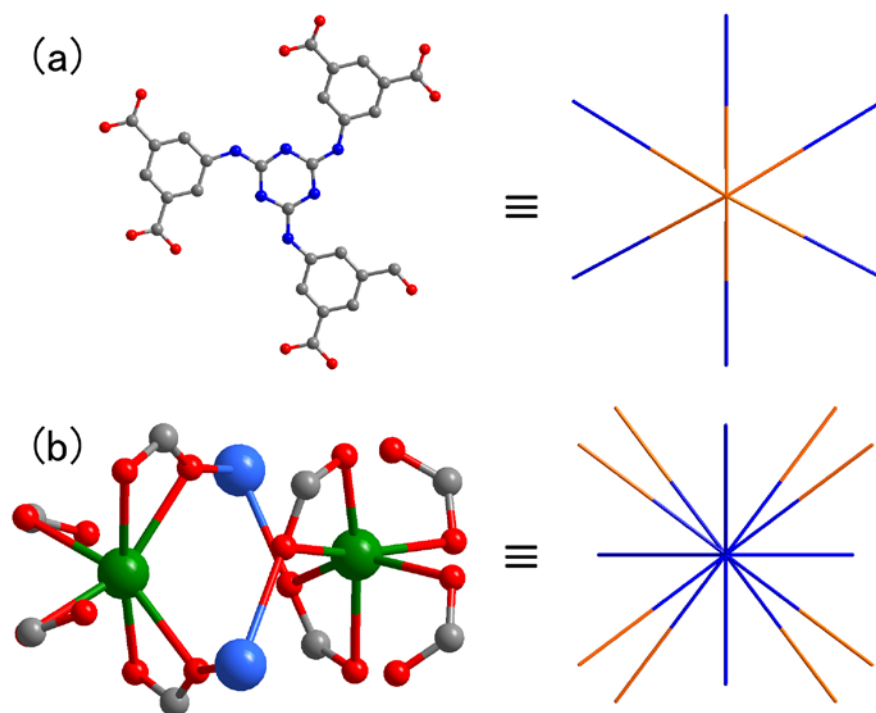

**Fig. S4** Illustration of topology of **1**: simplification of the organic  $\text{TDPAT}^{6-}$  linker (6-connected node) (a) and the inorganic  $[\text{Cd}_2\text{K}_2(\text{CO}_2)_8]$  clusters (12-connected nodes) (b)

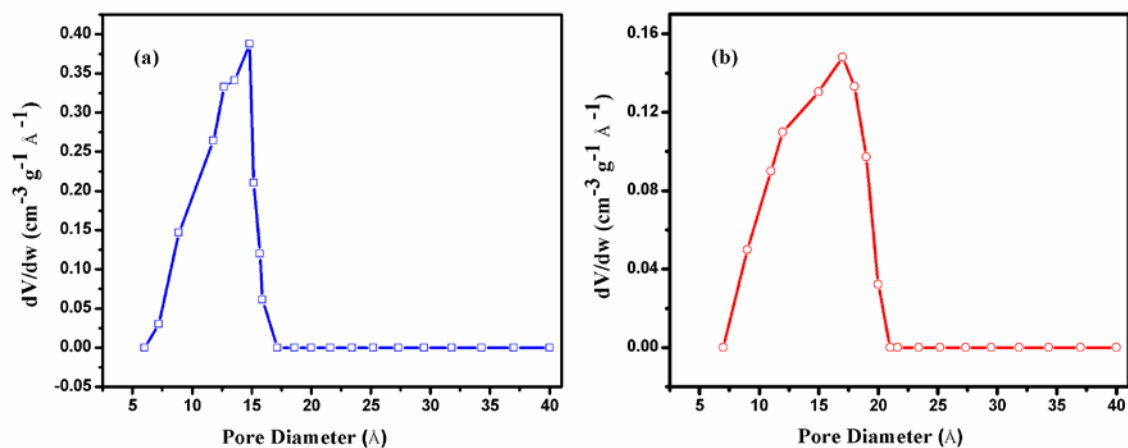

**Fig. S5** Pore size distribution plot estimated from the N<sub>2</sub> adsorption data at 87 K for **1(a)** and **2(b)**.

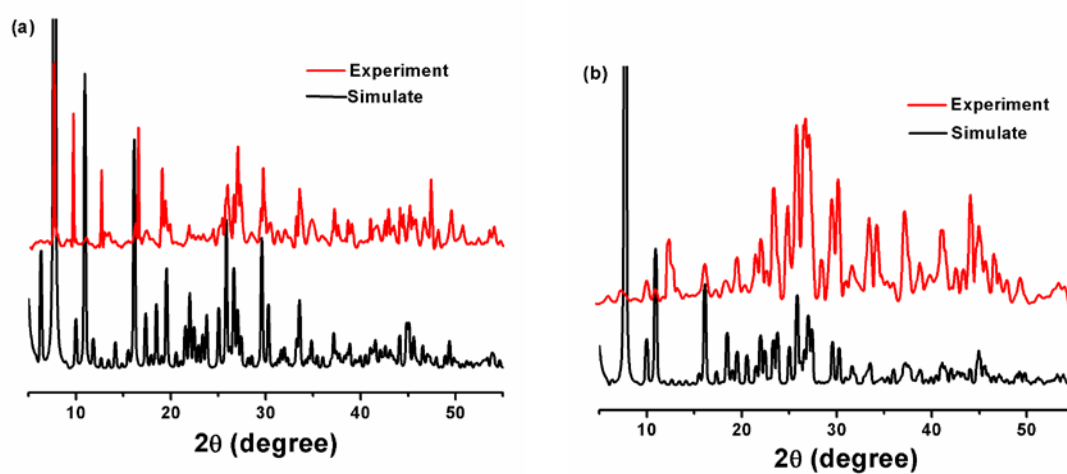

**Fig. S6** Simulated and experimental XRD powder patterns for compound **1 (a)** and compound **2 (b)**

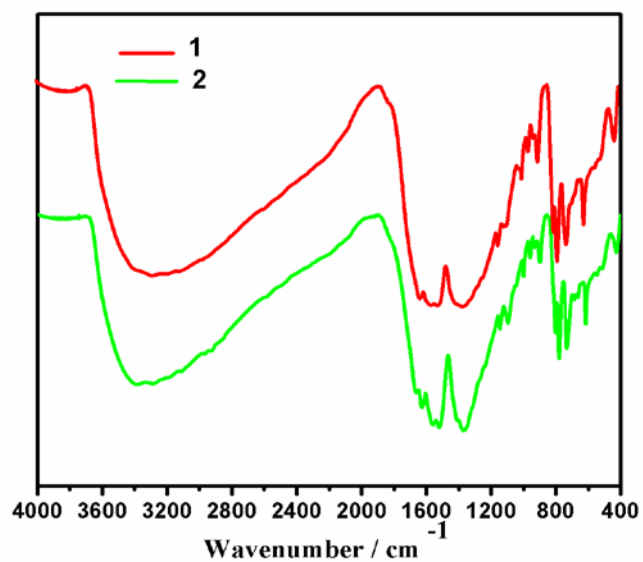

**Fig. S7** View of the IR spectra of compounds **1** and **2**.

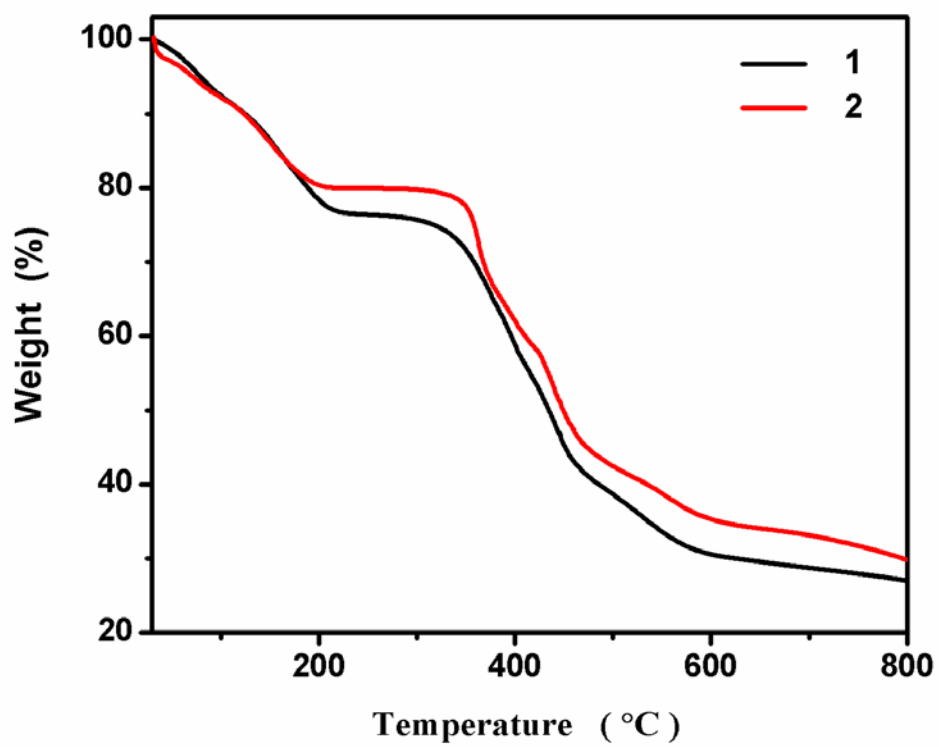

**Fig. S8** TGA curves of **1** (black solid line) and **2** (red solid line).

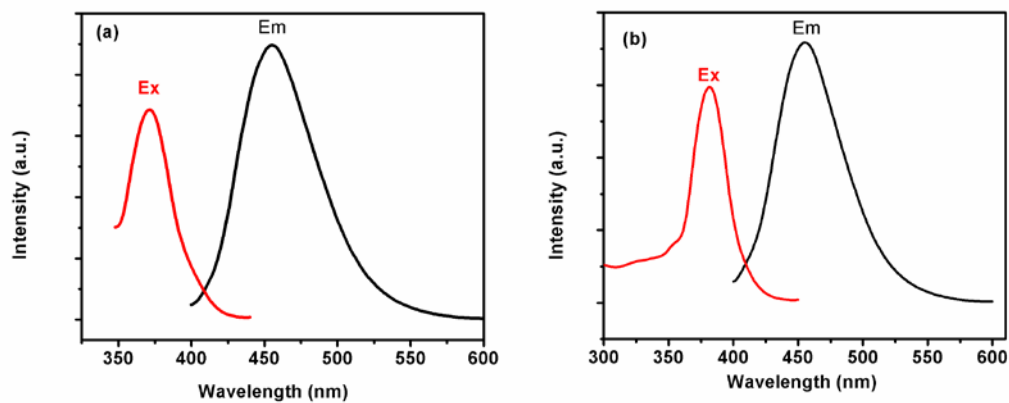

**Fig. S9** The excitation and emission spectra for **1** (a) and **2** (b) at room temperature.

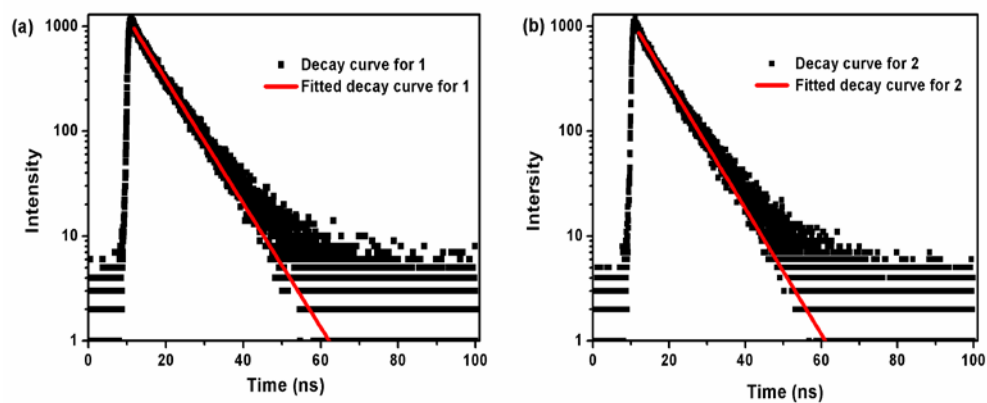

**Fig. S10** The luminescence decay curves for **1** (a) and **2** (b), determined by monitoring the maximal emissions excited at 372 nm.



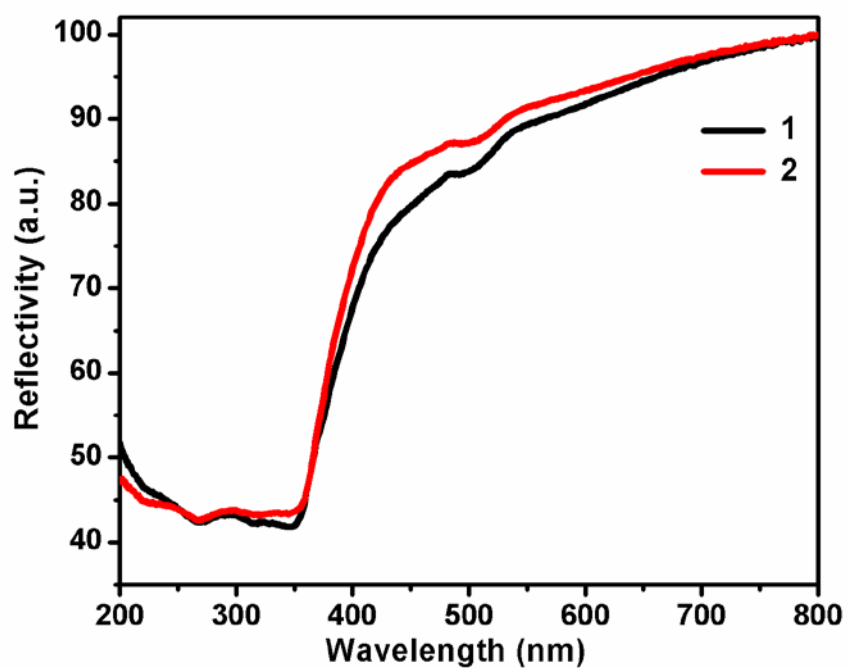

**Fig. S11** The diffuse reflectance spectra of compounds 1 and 2.

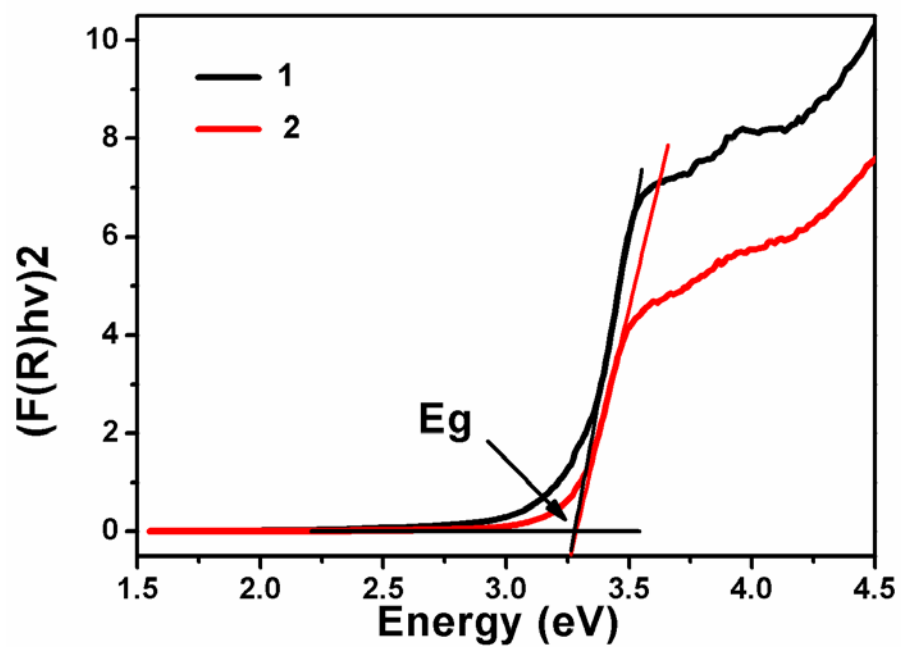

**Fig. S12** The relationship between  $[F(R)hv]^2$  and photon energy.

**Table S1** Crystallographic Data and Structure Refinement Results of **1** and **2**

| Compounds                                   | <b>1</b>                                                                                            | <b>2</b>                                                                                             |
|---------------------------------------------|-----------------------------------------------------------------------------------------------------|------------------------------------------------------------------------------------------------------|
| Formula                                     | C <sub>68</sub> H <sub>79.5</sub> N <sub>16</sub> O <sub>39.75</sub> Cd <sub>3</sub> K <sub>6</sub> | C <sub>68</sub> H <sub>79.5</sub> N <sub>16</sub> O <sub>39.75</sub> Cd <sub>3</sub> Rb <sub>6</sub> |
| CCDC                                        | 1537707                                                                                             | 1537708                                                                                              |
| Mr                                          | 2328.8                                                                                              | 2607.0                                                                                               |
| Space group                                 | <i>I</i> 432                                                                                        | <i>I</i> 432                                                                                         |
| <i>a</i> (Å)                                | 27.973(1)                                                                                           | 28.0152(2)                                                                                           |
| <i>b</i> (Å)                                | 27.973(1)                                                                                           | 28.0152(2)                                                                                           |
| <i>c</i> (Å)                                | 27.973(1)                                                                                           | 28.0152(2)                                                                                           |
| $\alpha$ (°)                                | 90                                                                                                  | 90                                                                                                   |
| $\beta$ (°)                                 | 90                                                                                                  | 90                                                                                                   |
| $\gamma$ (°)                                | 90                                                                                                  | 90                                                                                                   |
| <i>V</i> (Å <sup>3</sup> )                  | 21889(2)                                                                                            | 21988(4)                                                                                             |
| <i>Z</i>                                    | 8                                                                                                   | 8                                                                                                    |
| <i>D</i> <sub>c</sub> (g cm <sup>-3</sup> ) | 1.413                                                                                               | 1.575                                                                                                |
| <i>M</i> (mm <sup>-1</sup> )                | 0.887                                                                                               | 3.296                                                                                                |
| GOF                                         | 1.031                                                                                               | 1.033                                                                                                |
| <i>R</i> <sub>1</sub> <sup>a</sup>          | 0.0415                                                                                              | 0.0567                                                                                               |
| <i>wR</i> <sub>2</sub> <sup>a</sup>         | 0.1094                                                                                              | 0.1621                                                                                               |

$$^a R = \sum (||F_o| - |F_c||) / \sum |F_o|, wR = \{ \sum w[(F_o^2 - F_c^2)^2] / \sum w[(F_o^2)^2] \}^{1/2}; [F_o > 4(F_\sigma)].$$

**Table S2** Selected bond distances (Å) and angles (°) for **1** and **2**

| Compound <b>1</b> |             |            |             |
|-------------------|-------------|------------|-------------|
| Cd1—O1D           | 2.252 (5)   | K1—O2D     | 2.759 (5)   |
| Cd1—O1E           | 2.374 (5)   | K1—O4      | 2.654 (3)   |
| Cd1—O3            | 2.414 (5)   | K1—O5      | 2.942 (5)   |
| Cd1—O3C           | 2.358 (5)   | K2—O3      | 2.479 (6)   |
| Cd1—O4            | 2.268 (6)   | K2—O6      | 2.584 (5)   |
| Cd1—O4C           | 2.483 (5)   |            |             |
| O1D—Cd1—O4        | 107.93 (18) | O4—K1—O4A  | 174.59 (16) |
| O1D—Cd1—O3C       | 91.6 (3)    | O4—K1—O2F  | 115.69 (12) |
| O1D—Cd1—O3        | 156.9 (3)   | O4—K1—O2D  | 68.54 (11)  |
| O1D—Cd1—O1E       | 73.7 (3)    | O4—K1—O5   | 71.03 (11)  |
| O1D—Cd1—O4C       | 81.6 (2)    | O4—K1—O5A  | 105.14 (11) |
| O4—Cd1—O3C        | 126.03 (14) | O2F—K1—O2D | 88.5 (2)    |
| O4—Cd1—O3         | 55.75 (15)  | O2D—K1—O5  | 88.86 (16)  |
| O4—Cd1—O1E        | 83.7 (2)    | O2D—K1—O5A | 171.16 (13) |
| O4—Cd1—O4C        | 170.34 (18) | O6—K2—O3   | 147.9 (3)   |
| O3C—Cd1—O3        | 111.17 (17) | O6—K2—O3G  | 122.5 (3)   |
| O3C—Cd1—O4C       | 53.79 (14)  | O6—K2—O6G  | 91.2 (9)    |
| O3C—Cd1—O1E       | 150.1 (2)   | O5—K1—O5A  | 94.9 (3)    |
| O3—Cd1—O1E        | 87.3 (2)    | O3—K2—O3G  | 79.1 (2)    |

|                   |             |             |            |
|-------------------|-------------|-------------|------------|
| O3—Cd1—O4C        | 114.66 (14) | O3—K2—O6G   | 103.7 (4)  |
| O1E—Cd1—O4C       | 97.61 (17)  | O3G—K2—O6G  | 110.1 (3)  |
| <b>Compound 2</b> |             |             |            |
| Cd1—O1D           | 2.332 (12)  | Rb1—O2D     | 2.872 (12) |
| Cd1—O1E           | 2.360 (12)  | Rb1—O4      | 2.756 (6)  |
| Cd1—O3            | 2.395 (12)  | Rb1—O5      | 2.986 (9)  |
| Cd1—O3C           | 2.474 (11)  | Rb2—O3      | 2.595 (11) |
| Cd1—O4            | 2.178 (10)  | Rb2—O6      | 2.781 (7)  |
| Cd1—O4C           | 2.513 (9)   |             |            |
| O1D—Cd1—O4        | 110.1 (4)   | O4—Rb1—O4A  | 176.0 (3)  |
| O1D—Cd1—O3C       | 87.8 (6)    | O4—Rb1—O2F  | 115.5 (2)  |
| O1D—Cd1—O3        | 159.6 (5)   | O4—Rb1—O2D  | 67.7 (2)   |
| O1D—Cd1—O1E       | 73.4 (7)    | O4—Rb1—O5   | 72.4 (2)   |
| O1D—Cd1—O4C       | 78.4 (5)    | O4—Rb1—O5A  | 104.7 (2)  |
| O4—Cd1—O3C        | 125.9 (4)   | O4A—Rb1—O2F | 67.7 (2)   |
| O4—Cd1—O3         | 56.8 (3)    | O4A—Rb1—O2D | 115.5 (2)  |
| O4—Cd1—O1E        | 84.9 (5)    | O4A—Rb1—O5  | 104.7 (2)  |
| O4—Cd1—O4C        | 171.5 (4)   | O4A—Rb1—O5A | 72.4 (2)   |
| O3C—Cd1—O1E       | 148.5 (5)   | O2F—Rb1—O5  | 170.2 (3)  |
| O3C—Cd1—O4C       | 51.9 (3)    | O2F—Rb1—O5A | 89.9 (4)   |
| O3—Cd1—O1E        | 89.0 (6)    | O2D—Rb1—O5  | 89.9 (4)   |
| O3—Cd1—O4C        | 115.3 (3)   | O2D—Rb1—O5A | 170.2 (3)  |
| O1E—Cd1—O4C       | 98.7 (4)    | O5—Rb1—O5A  | 93.7 (5)   |
| O6—Rb2—O3         | 144.7 (4)   | O3—Rb2—O3G  | 73.3 (3)   |
| O6—Rb2—O3G        | 117.6 (5)   | O3—Rb2—O6G  | 101.8 (4)  |
| O6—Rb2—O6G        | 104.4 (6)   | O3G—Rb2—O6G | 110.5 (3)  |

Symmetry codes: (A)  $-x+1, -z+1, -y+1$ ; (B)  $y+1/2, z-1/2, x+1/2$ ; (C)  $z-1/2, -y+1/2, x+1/2$ ; (D)  $z-1/2, x-1/2, y+1/2$ ; (E)  $y, -x+1, z$ ; (F)  $-z+3/2, -y+1/2, -x+3/2$ ; (G)  $-y+1, -x+1, -z+2$ .

#### References:

1. Ma, D.; Li, B.; Zhou, X.; Zhou, Q.; Liu, K.; Zeng, G.; Li, G.; Shi, Z.; Feng, S., *Chem. Commun.*, **2013**, 49 (79), 8964-8966.
2. CrystalClear, *Version 1.36, Molecular Structure Corp and Rigaku Corp.*, The Woodlands, TX, and Tokyo, Japan, **2000**.
3. G. M. Sheldrick, *SHELXS 97, Program for Crystal Structure Solution*, University of Gottingen, Gottingen, Germany, **1997**.
4. G. M. Sheldrick, Crystal structure refinement with SHELXL, *Acta Crystallogr., Sec. C: Struct. Chem.*, **2015**, 71, 3-8.
5. A. L. Spek, *Acta Cryst.* **2009**, D65, 148-155
